# Supplementary material for: Poisson Plus Quantification for Digital PCR Systems
Source: PubMed Central journal article supplement (PMC5575031; doi:10.1038/s41598-017-09183-4), 2017-08-29
Supplement: 41598_2017_9183_MOESM1_ESM.pdf [file 41598_2017_9183_MOESM1_ESM.pdf]

# Poisson Plus Quantification for Digital PCR Systems

Nivedita Majumdar<sup>1,\*</sup>, Swapnonil Banerjee, Michael Pallas<sup>1</sup>, Thomas Wessel<sup>1</sup>, Patricia Hegerich<sup>1</sup>

<sup>1</sup>ThermoFisher Scientific, Life Sciences Group, South San Francisco, 94080, USA

\*[nivedita.majumdar@thermofisher.com](mailto:nivedita.majumdar@thermofisher.com)

## Appendix A

### Derivation of $P(\text{neg})$ in (6)

$$\begin{aligned}
 P(\text{neg}) &= \int_{-\infty}^{\infty} P(\text{neg}, v) dv \\
 &= \frac{1}{\sigma\sqrt{2\pi}} \int_{-\infty}^{\infty} e^{-Cv} e^{-\frac{-(v-v_0)^2}{2\sigma^2}} dv \\
 &= \frac{1}{\sigma\sqrt{2\pi}} \int_{-\infty}^{\infty} e^{-Cv} e^{-\frac{[v^2-2vv_0+v_0^2]}{2\sigma^2}} dv \\
 &= \frac{1}{\sigma\sqrt{2\pi}} e^{-\frac{v_0^2}{2\sigma^2}} \int_{-\infty}^{\infty} e^{-Cv} e^{-\frac{v^2}{2\sigma^2}} e^{\frac{vv_0}{\sigma^2}} dv \\
 &= \frac{1}{\sigma\sqrt{2\pi}} e^{-\frac{v_0^2}{2\sigma^2}} \int_{-\infty}^{\infty} e^{-\frac{v^2}{2\sigma^2}} e^{v(\frac{v_0}{\sigma^2}-C)} dv \quad (i)
 \end{aligned}$$

It is known that from Feynman, et al [7] that:

$$\int_{-\infty}^{\infty} e^{ax^2+bx} dx = \sqrt{\pi/-a} e^{-b^2/4a} \quad (ii)$$

Using  $a = -\frac{1}{2\sigma^2}$  and  $b = \frac{v_0}{\sigma^2} - C$  in (ii), (i) becomes:

$$\begin{aligned}
 P(\text{neg}) &= \frac{1}{\sigma\sqrt{2\pi}} e^{-\frac{v_0^2}{2\sigma^2}} \sqrt{\pi(2\sigma^2)} e^{\frac{-(\frac{v_0}{\sigma^2}-C)^2}{4(-\frac{1}{2\sigma^2})}} \\
 &= \frac{1}{\sigma\sqrt{2\pi}} \frac{\sqrt{\pi(2\sigma^2)} e^{\left(\frac{v_0^2}{\sigma^4}+C^2-\frac{2Cv_0}{\sigma^2}\right)\frac{\sigma^2}{2}}}{e^{\frac{v_0^2}{2\sigma^2}}} \\
 &= \frac{1}{\sigma\sqrt{2\pi}} \frac{\sqrt{\pi(2\sigma^2)} e^{\left(\frac{v_0^2}{\sigma^4}+C^2-\frac{2Cv_0}{\sigma^2}\right)\frac{\sigma^2}{2}}}{e^{\frac{v_0^2}{2\sigma^2}}} \\
 &= \frac{\frac{v_0^2}{2\sigma^2} e^{\left(\frac{C^2\sigma^2}{2}-\frac{2Cv_0\sigma^2}{\sigma^2}\right)}}{e^{\frac{v_0^2}{2\sigma^2}}} \\
 &= e^{\frac{1}{2}\sigma^2 C^2 - Cv_0} \quad (iii), \text{ which is the same as (6).}
 \end{aligned}$$

### Derivation of $C$ , as given by (7)

The concentration  $C$  can be solved from (6) as follows:

$$P(\text{neg}) = \exp\left(\frac{1}{2}\sigma^2 C^2 - Cv_0\right) \quad (v)$$

Taking logarithm on both sides of (v) and rearranging we obtain:

$$\frac{1}{2}\sigma^2 C^2 - Cv_0 - \ln P(\text{neg}) = 0 \quad (\text{vi})$$

Solving for  $C$  from the above equation, we obtain

$$C = \frac{v_0 \pm \sqrt{v_0^2 + 2\sigma^2 \ln P(\text{neg})}}{\sigma^2} \quad (\text{vii}), \text{ which is the same as (7).}$$

### **Derivation of (8) from (7) keeping the negative sign only**

$C$  in (7) can be written as:

$$= \frac{v_0 \pm v_0 \sqrt{1 + \frac{2\sigma^2}{v_0^2} \ln(P_{\text{neg}})}}{\sigma^2} \quad (\text{viii})$$

Using the fact that  $(1+x)^{1/2} \approx 1 + \frac{x}{2}$  for small  $x$ ,  $C$  can be simplified as:

$$C \approx \frac{v_0 \pm v_0 (1 + \frac{\sigma^2}{v_0^2} \ln(P_{\text{neg}}))}{\sigma^2} \quad (\text{ix})$$

Using only the negative sign in (ix), we obtain

$$C \approx \frac{v_0 - v_0 - \frac{\sigma^2}{v_0} \ln(P_{\text{neg}})}{\sigma^2} = \frac{-\ln(P_{\text{neg}})}{v_0} \quad (\text{x}), \text{ which is same as (8).}$$

### **Appendix B Derivation of (13)**

$$P(\text{neg}) = \int_0^\infty P(\text{neg}, v) dv \quad (\text{i})$$

Using  $P(\text{neg}, v)$ , as given by (11), in (i), we obtain

$$\begin{aligned} P(\text{neg}) &= \frac{1}{\sigma \sqrt{\frac{\pi}{2} \operatorname{erfc}\left[-\frac{1}{\sqrt{2}}\left(\frac{v_0}{\sigma}\right)\right]}} \int_0^\infty e^{-Cv} e^{-\frac{(v-v_0)^2}{2\sigma^2}} dv \\ &= \frac{1}{\sigma \sqrt{\frac{\pi}{2} \operatorname{erfc}\left[-\frac{1}{\sqrt{2}}\left(\frac{v_0}{\sigma}\right)\right]}} I \end{aligned} \quad (\text{ii})$$

where

$$\begin{aligned} I &= \int_0^\infty e^{-Cv} e^{-\frac{(v-v_0)^2}{2\sigma^2}} dv \\ &= \int_0^\infty e^{-Cv} e^{-\frac{(v^2 - 2vv_0 + v_0^2)}{2\sigma^2}} dv \\ &= e^{-\frac{v_0^2}{2\sigma^2}} \int_0^\infty e^{-Cv} e^{-\frac{(v^2 - 2vv_0)}{2\sigma^2}} dv \\ &= e^{-\frac{v_0^2}{2\sigma^2}} \int_0^\infty e^{-\frac{v^2}{2\sigma^2}} e^{v\left(\frac{v_0}{\sigma^2} - C\right)} dv \\ &= e^{-\frac{v_0^2}{2\sigma^2}} \int_0^\infty e^{-\mathcal{H}v^2 + \mathcal{M}v} dv \end{aligned} \quad (\text{iii})$$

where

$$\mathcal{H} = \frac{1}{2\sigma^2}, \mathcal{M} = \frac{v_0}{\sigma^2} - C. \quad (\text{iv})$$

Let

$$I' = \int_0^\infty e^{-\mathcal{H}v^2 + \mathcal{M}v} dv$$

$$\begin{aligned}
&= \int_0^\infty e^{-\mathcal{H}(v^2 - \frac{\mathcal{M}}{\mathcal{H}}v)} dv \\
&= \int_0^\infty e^{-\mathcal{H}(v^2 - 2v\frac{\mathcal{M}}{2\mathcal{H}} + \frac{\mathcal{M}^2}{4\mathcal{H}^2} - \frac{\mathcal{M}^2}{4\mathcal{H}^2})} dv \\
&= \int_0^\infty e^{-\mathcal{H}(v - \frac{\mathcal{M}}{2\mathcal{H}})^2} e^{\frac{\mathcal{M}^2}{4\mathcal{H}}} dv
\end{aligned}$$

Substituting  $\mathcal{H}$  and  $\mathcal{M}$  given by (iv)

$$\begin{aligned}
&= \int_0^\infty e^{-\frac{1}{2\sigma^2}\left(v - \frac{v_0 - C}{\sigma^2}\right)^2} e^{\frac{(v_0 - C)^2}{4\sigma^2}} dv \\
&= e^{\frac{\sigma^2(v_0 - C)^2}{2}} \int_0^\infty e^{-\frac{1}{2\sigma^2}\left(v - \sigma^2\left(\frac{v_0 - C}{\sigma^2}\right)\right)^2} dv \\
&= e^{\frac{\sigma^2(v_0^2 - 2Cv_0 + C^2)}{2}} \int_0^\infty e^{-\frac{1}{2\sigma^2}(v - v_0 + C\sigma^2)^2} dv \\
&= e^{\frac{v_0^2}{2\sigma^2}} e^{-Cv_0 + \frac{1}{2}(\sigma^2 C^2)} \int_0^\infty e^{-\frac{1}{2\sigma^2}(v - v_0 + C\sigma^2)^2} dv \quad (v)
\end{aligned}$$

Using (v) in (iii), we obtain:

$$I = e^{-Cv_0 + \frac{1}{2}(\sigma^2 C^2)} \int_0^\infty e^{-\frac{1}{2\sigma^2}(v - v_0 + C\sigma^2)^2} dv \quad (vi)$$

Let

$$I'' = \int_0^\infty e^{-\frac{1}{2\sigma^2}(v - v_0 + C\sigma^2)^2} dv \quad (vii)$$

Making the substitution of variable

$$v'' = \frac{1}{\sqrt{2}\sigma} (v - (v_0 - C\sigma^2)) \quad (viii)$$

in (vii), we obtain,

$$\begin{aligned}
I'' &= \int_{\frac{v_0 - C\sigma^2}{\sqrt{2}\sigma}}^\infty e^{-v''^2} \sqrt{2}\sigma dv'' \\
&= \sqrt{2}\sigma \frac{\sqrt{\pi}}{2} \frac{2}{\sqrt{\pi}} \int_{\frac{v_0 - C\sigma^2}{\sqrt{2}\sigma}}^\infty e^{-v''^2} dv'' \\
&= \sqrt{2}\sigma \frac{\sqrt{\pi}}{2} \operatorname{erfc}\left(-\frac{v_0 - C\sigma^2}{\sqrt{2}\sigma}\right) \quad (ix)
\end{aligned}$$

Using (vi) and (ix) in (ii), we obtain

P(neg)

$$\begin{aligned}
&= \frac{1}{\sigma \sqrt{\frac{\pi}{2}} \operatorname{erfc}\left[-\frac{1}{\sqrt{2}}\left(\frac{v_0}{\sigma}\right)\right]} \sqrt{2}\sigma \frac{\sqrt{\pi}}{2} \operatorname{erfc}\left[-\frac{1}{\sqrt{2}}\left(\frac{v_0}{\sigma} - C\sigma\right)\right] e^{-Cv_0 + \frac{1}{2}\sigma^2 C^2} \\
&= \frac{\operatorname{erfc}\left[-\frac{1}{\sqrt{2}}\left(\frac{v_0}{\sigma} - C\sigma\right)\right]}{\operatorname{erfc}\left[-\frac{1}{\sqrt{2}}\left(\frac{v_0}{\sigma}\right)\right]} e^{-Cv_0 + \frac{1}{2}\sigma^2 C^2} \quad (x)
\end{aligned}$$

which is the same as (13).

## Appendix C Steps of the simulations

1) Generate a normal distribution with a given mean and coefficient of variation

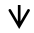

2) For each concentration, find probability  $p$ , of 0 molecules/partition, assuming uniform partition sizes. The probability of a partition to obtain a molecule is made proportional to the size of the partition. So larger partitions have the greater chance of containing a molecule.

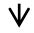

3) Generate a random number  $r$  between 0 and 1. If  $r < p$ , then no molecules are assumed to be in that partition.

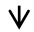

4) Quantify the number of molecules per partition from this population of partitions with at least one or no molecules. Repeat over the number of iterations.
